# Supplementary material
Source: PubMed Central journal article supplement (PMC8115947)
Supplement: PEER_Neuropathic_fig1.pdf [file PEER_Neuropathic_fig1.pdf]

# Figure 1

PEER SIMPLIFIED DECISION AID / NEUROPATHIC PAIN

## How many people will have their neuropathic pain meaningfully improved ( $\geq 30\%$ ) by different treatments?

### Anticonvulsants \*

40 trials (9575 participants)

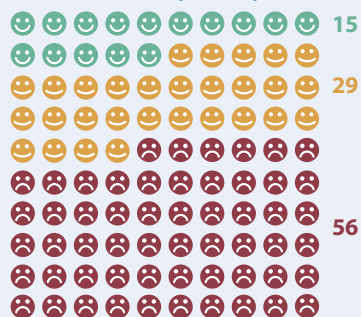

### SNRIs \*\*

8 trials (2746 participants)

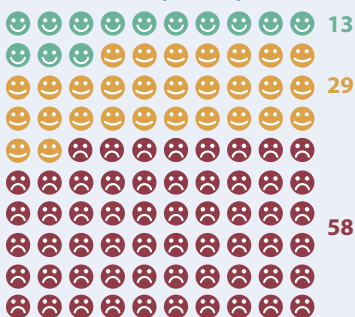

### Rubefacients (Capsaicin)

10 trials (2344 participants)

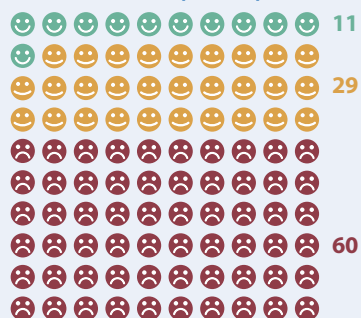

### Opioids

6 trials (1149 participants)

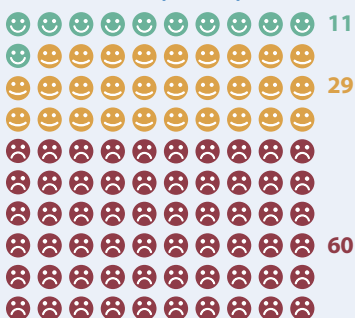

### TCAs (Amitriptyline)

4 trials (382 participants)

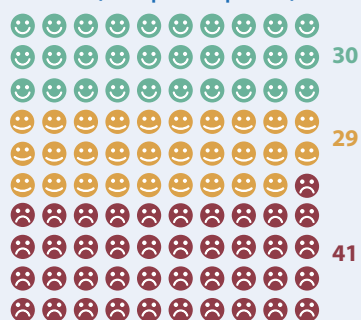

### Acupuncture

3 trials (247 participants)

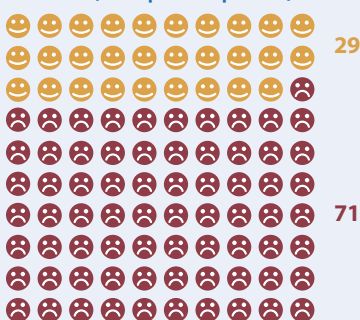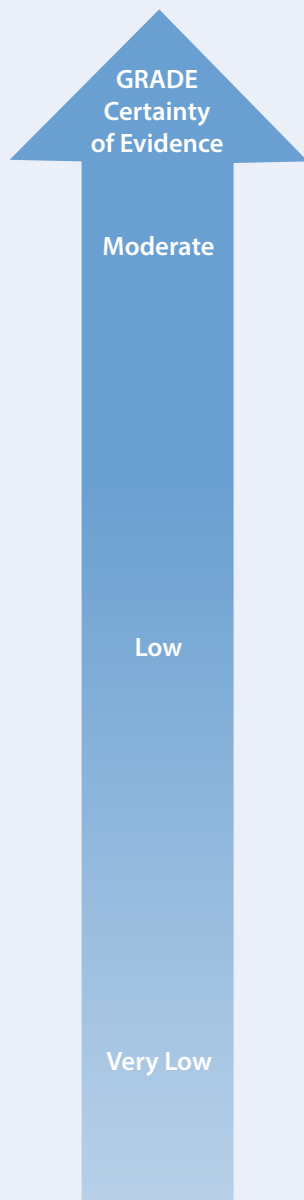

Improve with treatment  
 Improve with control  
 Do not improve

\* Anticonvulsants included pregabalin, gabapentin, oxcarbazepine and topiramate

\*\*SNRIs included duloxetine, venlafaxine and desvenlafaxine
