# Supplementary material
Source: PubMed Central journal article supplement (PMC8115947)
Supplement: PEER_Neuropathic_fig2.pdf [file PEER_Neuropathic_fig2.pdf]

Figure 2

# Treatment Options for Neuropathic Pain

| BENEFITS AND HARMS                                  | TREATMENT                       | NUMBER NEEDED TO TREAT (NNT) | WITHDRAWALS DUE TO ADVERSE EVENTS* (TREATMENT VS PLACEBO) | ADVERSE EVENTS (EXAMPLES)                                        | COST               | PRESCRIBING COMMENTS                                                                                                                                                                        |
|-----------------------------------------------------|---------------------------------|------------------------------|-----------------------------------------------------------|------------------------------------------------------------------|--------------------|---------------------------------------------------------------------------------------------------------------------------------------------------------------------------------------------|
| 😊<br>Benefits likely exceed harms                   | <b>Pregabalin</b>               | 7                            | 11% vs 5% NNH 17                                          | Dizziness, peripheral edema, weight gain, ataxia, somnolence     | \$\$               | Doses ranged from 75 mg to 600 mg daily (most commonly studied dose was 300 mg daily).                                                                                                      |
|                                                     | <b>Gabapentin</b>               | 7                            | 13% vs 8% NNH 22                                          | Dizziness, somnolence, peripheral edema                          | \$ to \$\$         | Doses varied, with the most commonly studied dose ranging from 900-3600 mg per day.                                                                                                         |
|                                                     | <b>SNRIs</b>                    | 8                            | 13% vs 5% NNH 13                                          | Dizziness, nausea, somnolence                                    | \$ to \$\$\$       | Studied drugs included duloxetine (40-120 mg), venlafaxine (75-225 mg), and desvenlafaxine (50-400 mg).                                                                                     |
|                                                     | <b>Rubefaciants (Capsaicin)</b> | 10                           | 6% vs 2% NNH 25                                           | Application site redness, burning, pain, pruritus and swelling   | \$ to \$\$         | Benefit seen with both 0.075% cream and 8% high concentration patch (8% Patch Not Available in Canada).                                                                                     |
| 😊<br>Benefits may not exceed harms in some patients | <b>Opioids</b>                  | 10                           | 14% vs 6% NNH 12                                          | Somnolence, pruritus, nausea, vomiting, constipation, dizziness  | \$\$ to \$\$\$     | While 13% of patients improved above placebo, many adverse events were reported. Approximately 3% of patients with chronic pain will develop opioid use disorder over 2 years. <sup>5</sup> |
| 😞<br>No benefit                                     | <b>Acupuncture</b>              | No difference from placebo   | No difference from placebo                                | Not reported                                                     | \$\$\$ to \$\$\$\$ | Types of acupuncture included traditional, auricular and electroacupuncture. Patients were followed for 8-10 weeks.                                                                         |
| 😞<br>Harms likely exceed benefits                   | <b>Oxcarbazepine</b>            | 7                            | 26% vs 7% NNH 6                                           | Somnolence, back pain, nausea, dizziness, serious adverse events | \$\$               | Effects were no different than placebo, however high withdrawals due to adverse events were seen.                                                                                           |
| 😐<br>Unclear Benefits/Harms                         | <b>TCAs (Amitriptyline)**</b>   | 4                            | 16% vs 7% NNH 12                                          | Dry mouth, dizziness, drowsiness                                 | \$ to \$\$         | RCTs are small and at high risk of bias. Most commonly studied dose was 25-75 mg daily.                                                                                                     |

\*Statistically significant findings reported

Cost approximates dollars per month: \$ = <25, \$\$ = 25-50, \$\$\$ = >50-100, \$\$\$\$ = >100

**SNRI:** Serotonin Norepinephrine Reuptake Inhibitors, **TCAs:** Tricyclic Antidepressants, **NNH:** Number Needed to Harm

**Note:** No responder data identified for exercise and lidocaine.

\*\*Due to an inconsistent estimate of effect and statistical significance, uncertainty existed in our analysis of TCAs. To clarify the potential estimate of effect, TCA data was pulled from a previously published Cochrane review<sup>2</sup>
